# 1 ALOHA: AI-guided tool for the quantification of 2 venom-induced haemorrhage in mice

3 Timothy P. Jenkins<sup>1\*#</sup>, William Michael Laprade<sup>2\*</sup>, Andrés Sánchez<sup>3</sup>, Tulika Tulika<sup>1</sup>, Carol  
4 O'Brien<sup>1</sup>, Christoffer V. Sørensen<sup>1</sup>, Trenton K. Stewart<sup>4</sup>, Thomas Fryer<sup>1,5</sup>, Andreas H.  
5 Laustsen<sup>1</sup>, José María Gutiérrez<sup>3</sup>

6 <sup>1</sup>Department of Biotechnology and Biomedicine, Technical University of Denmark, Kongens Lyngby,  
7 Denmark

8 <sup>2</sup>Department for Mathematics and Computer Science, Technical University of Denmark, Kongens  
9 Lyngby, Denmark

10 <sup>3</sup>Instituto Clodomiro Picado, Facultad de Microbiología, Universidad de Costa Rica, San José, Costa  
11 Rica

12 <sup>4</sup>Warwick Medical School, The University of Warwick, Coventry, UK

13 <sup>5</sup>Novozymes, Kongens Lyngby, Denmark

14  
15 \*Equal contributions

16 #Corresponding author:  
17 Timothy P. Jenkins: [tpaje@dtu.dk](mailto:tpaje@dtu.dk)

18  
19 Journal options:  
20 PLoS NTD, BMC Biology, PLOS Computational Biology, Toxicon: X, Toxicon

## 21 Abstract

22 Venom-induced haemorrhage constitutes a severe pathology in snakebite envenomings,  
23 especially those inflicted by viperid species. In order to both explore venom compositions  
24 accurately, and evaluate the efficacy of viperid antivenoms for the neutralisation of  
25 haemorrhagic activity it is essential to have available a precise, quantitative tool for empirically  
26 determining venom-induced haemorrhage. Thus, we have built on our prior approach and  
27 developed a new AI-guided tool (ALOHA) for the quantification of venom-induced  
28 haemorrhage in mice. Using a smartphone, it takes less than a minute to take a photo, upload  
29 the image, and receive accurate information on the magnitude of a venom-induced  
30 haemorrhagic lesion in mice. This substantially decreases analysis time, reduces human error,  
31 and does not require expert haemorrhage analysis skills. Furthermore, its open access web-  
32 based graphical user interface makes it easy to use and implement in laboratories across the  
33 globe. Together, this will reduce the resources required to preclinically assess and control the  
34 quality of antivenoms, whilst also expediting the profiling of hemorrhagic activity in venoms for  
35 the wider toxinology community.

36

## 37 1. Introduction

38 Snakebite envenoming is a major public health problem, especially in the developing world  
39 [1]. Indeed, it is responsible for substantial morbidity and mortality, particularly in the  
40 impoverished areas of sub-Saharan Africa, South to Southeast Asia, Papua New Guinea, and  
41 Latin America [1–4]. Whilst accurate estimates are difficult to make, it is believed that between  
42 1.8–2.7 million people worldwide are envenomed each year, resulting in 80,000 to 140,000  
43 deaths and 400,000 survivors left with permanent sequelae [5–7].

44

45 The severity of a given envenoming is determined by several factors, such as the amount of  
46 venom injected, the anatomical location of the bite, and the physiological status of the victim  
47 [8]. In addition, there is a great variability in the composition of the venoms and the  
48 predominant toxins present in different venoms, not only between genera, but also within a  
49 single species [9]. Consequently, the clinical manifestations and pathophysiological effects of  
50 envenomings can vary greatly depending on the offending snake species [10]. One such effect  
51 is haemorrhage. Indeed, envenomings by many snakes, predominantly by species belonging  
52 to the family Viperidae, but also some from the family Colubridae (*sensu lato*), induce local  
53 and systemic haemorrhage, further causing local tissue damage and cardiovascular  
54 disturbances [8,11,12]. Specifically, blood vessel damage leads to extravasation, which  
55 contributes to local tissue damage and poor muscle regeneration. In addition, massive  
56 systemic haemorrhage contributes to hemodynamic disturbances and cardiovascular shock  
57 [8,13]. Consequently, the underlying mechanisms by which snake venoms induce  
58 haemorrhage, the characterisation of hemorrhagic toxins, and the clinical manifestations of  
59 envenomings have, for a long time, presented a key area of fundamental, but also translational  
60 research within the field of Toxinology [11]. Venom-induced haemorrhage is mainly the  
61 consequence of the damage induced by snake venom metalloproteinases (SVMPs) on the  
62 microvasculature, due to the enzymatic degradation of key structural components in the  
63 basement membrane of capillary vessels [12]. The haemorrhagic activity of venoms is further  
64 potentiated by the action of venom toxins that affect haemostasis, which induce consumption  
65 coagulopathy, thrombocytopenia, and platelet hypoaggregation [1,14].

66

67 The only specific treatment currently available for snakebite envenomings is the intravenous  
68 administration of animal-derived antivenom [8,15]. Importantly, each batch of antivenom that  
69 is produced needs to undergo rigorous quality control; this includes the assessment of the  
70 ability of antivenoms to neutralise the lethal effect of venoms in mice [16,17]. In addition, and  
71 owing to the complex pathophysiology of snakebite envenomings, other relevant effects, such  
72 as the antivenom's neutralising potential of venom-induced haemorrhage, are also part of the  
73 preclinical assessment of antivenom efficacy [16]. The most widely used method for analysing  
74 haemorrhage is the skin test originally developed in rabbits [18], and later on adapted for use  
75 in rats [19] and mice [20]. In the adaptation of this method for mice, a range of different venom  
76 concentrations are injected intradermally in the abdominal region. After a predefined time  
77 interval, mice are euthanised and carefully dissected in order to allow the assessment of the  
78 inner surface of the skin. Originally, this was followed solely by a rough manual measurement  
79 of the area of the haemorrhagic lesion. Since this method did not take into account the intensity  
80 of the lesion, a computationally assisted update to this method was reported in 2017, in which  
81 an image of the lesion is taken, and both the size and the intensity are measured accurately,  
82 thus providing a more systematic and quantitative evaluation of extravasation [21]. The study  
83 also introduced a new unit for the assessment of the severity of a given venom-induced  
84 hemorrhagic lesion, i.e. the haemorrhagic unit (HaU) [21]. Whilst this method presented an  
85 improvement in accuracy and speed of the quantification of snake venom-induced  
86 haemorrhagic activity, it still required manual identification of the lesions and specialised  
87 equipment. It thus remained subject to human error and was not optimally accessible to  
88 researchers across the globe.

89  
90 Thus, we present a new and more accessible artificial intelligence (AI)-guided tool for the  
91 automatic assessment of venom-induced haemorrhage, ALOHA (  
92 <https://github.com/laprade117/ALOHA>). We trained a machine learning algorithm to  
93 automatically identify haemorrhagic lesions, adjust for lighting biases, scale the image, extract  
94 lesion area and intensity, and calculate the HaUs. Finally, we evaluate the performance of this  
95 algorithm and discuss its utility in relation to rapid, robust, and semi-automated assessment  
96 of snake venom-induced haemorrhage.

97

## 98 **2. Methods**

### 99 **2.1 Snake venom**

100 The venom of *Bothrops asper* was used in this study since its haemorrhagic activity has been  
101 widely studied. Venom of *B. asper* (batch number 03–06 Bap P) was obtained from adult  
102 specimens captured in the Pacific region of Costa Rica and maintained in captivity at the  
103 Serpentarium of Instituto Clodomiro Picado, Universidad de Costa Rica, San José, Costa  
104 Rica. Samples of venom correspond to pools obtained from many adult specimens and were  
105 stabilised by lyophilisation and stored at  $-20^{\circ}\text{C}$ . Solutions of venoms in 0.12 M NaCl, 0.04 M  
106 phosphate, pH 7.2 buffer (PBS) were prepared immediately before use.

107

### 108 **2.2 Haemorrhagic activity**

109 Haemorrhagic activity was assessed following the method described by Jenkins et al. (2017)  
110 with some modifications (c.f. below). Briefly, groups of four mice of both sexes (18–20 g; CD-  
111 1 strain) were injected intradermally with different amounts of *B. asper* venom (1, 2, 4, 8, 16  
112  $\mu\text{g}$ ) dissolved in 100  $\mu\text{L}$  PBS. Two hours after injection, mice were sacrificed by  $\text{CO}_2$  inhalation,  
113 and their skin was dissected. Mice were first placed on a standardised A4 printout template

114 sheet to measure the haemorrhagic lesion on the inner surface of the skin, using the method  
115 described below; then the same mice were also placed on the table without the template  
116 printout sheet, with pictures being taken for both approaches. All experiments involving the  
117 use of mice were approved by the Institutional Committee for the Care and Use of Laboratory  
118 Animals (CICUA) of the University of Costa Rica (approval number CICUA 82-08).

119

### 120 **2.3. Printout sheet**

121 To allow for a standardised analysis of the haemorrhagic lesions, as well as to facilitate the  
122 image analysis algorithms, we prepared an A4 printout sheet which the mice were placed on.  
123 This sheet outlines where to place the mice and includes different lines and boxes of defined  
124 lengths that allow for the scaling of the image (Fig.1). We also used a cut out mask to be  
125 placed on the mice to facilitate lesion identification (Fig.1). Printable versions of these two  
126 components can be found in supplementary Figure 1 and 2.

127

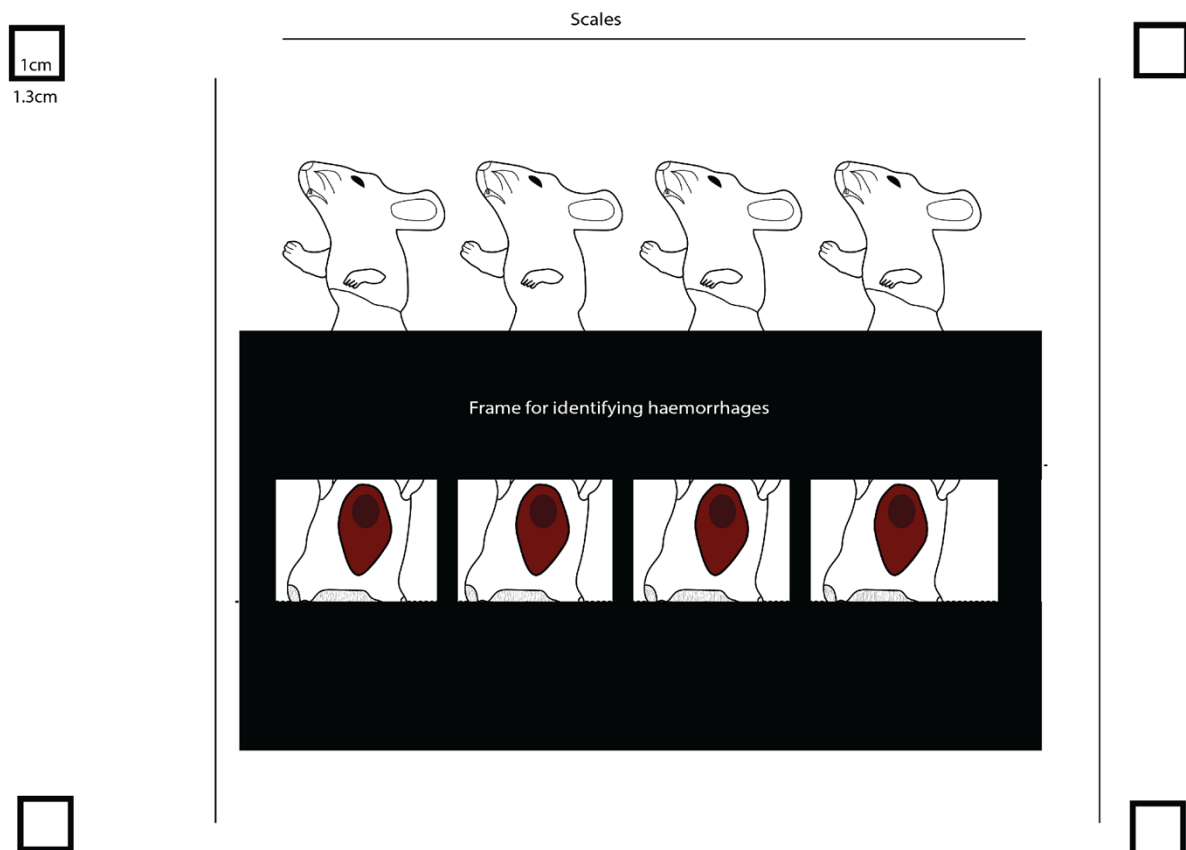

128

129 **Figure 1. Explanation of the printable template upon which the mice should be placed.**

130 The multiple scales across the page allow for the automatic scaling by the tool and take into  
131 account pictures obtained from different angles. The black frame acts as a cut out mask to  
132 facilitate the automatic identification of haemorrhagic lesions.

133

### 134 **2.4. Description of machine learning guided approach of quantifying 135 haemorrhagic activity**

136 We trained a machine learning algorithm to automatically identify haemorrhagic lesions, adjust  
137 for lighting biases, scale the image, extract haemorrhagic lesion area and intensity, and

138 calculate the HaUs. This was then implemented in an accessible fashion via a graphical user  
 139 interface (GUI) as the ALOHA tool (Fig. 2).  
 140

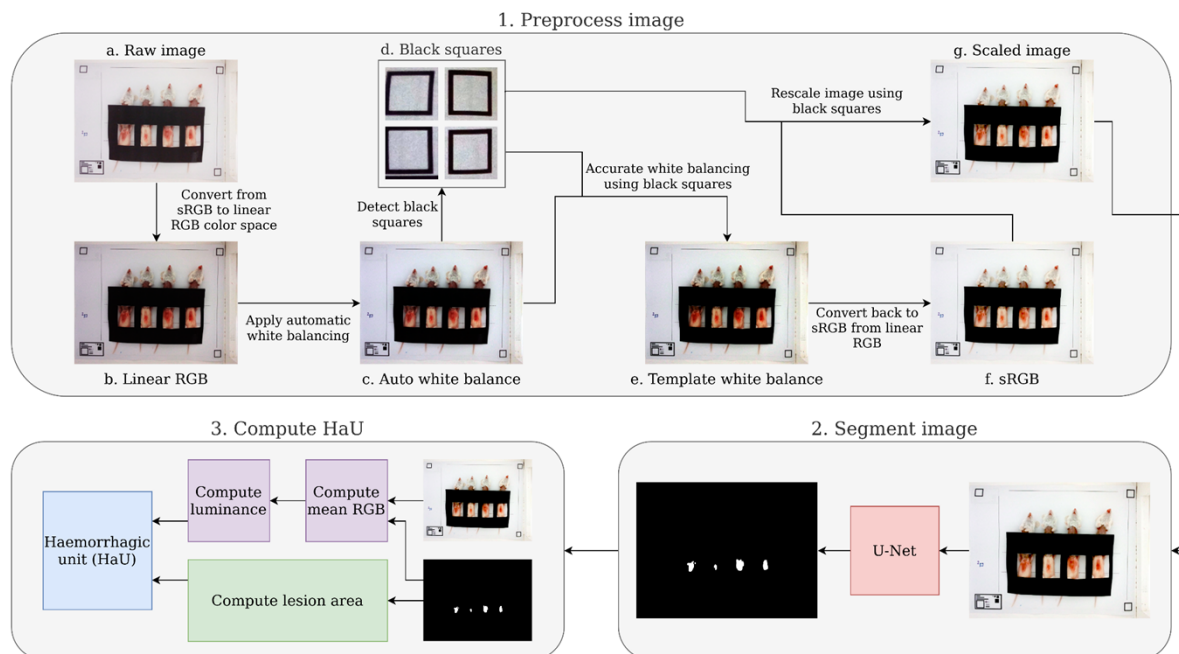

141  
 142 **Figure 2. Overview of the workflow for ALOHA.** First, the raw image is imported and  
 143 converted from sRGB to linear RGB. Thereafter, the image is white balanced and  
 144 subsequently further white balanced using the colour of the paper detected via the scaling  
 145 squares. In parallel, the image is rescaled using the same squares. This processed image is  
 146 then used for segmentation and automatic identification of the haemorrhagic lesions.  
 147 Together, this information is used to compute the lesion area and luminance, which is then  
 148 combined into a HaU score to assess the overall hemorrhagic lesion.

149  
 150 **2.4.1. Conversion to linear RGB and white balancing**

151 In order to create reproducible results across images, it is necessary to white balance the  
 152 images prior to computing the HaUs. First, the images were converted to a linear RGB colour  
 153 space as in Jenkins et al. 2017 [21], then auto white balancing, based on the method used in  
 154 the GNU Image Manipulation Program (<https://www.gimp.org>), was applied. For images that  
 155 use our template, we applied a second white balancing step for higher accuracy using  
 156 information extracted from the template image. Firstly, we detected the black boxes in the four  
 157 corners of the image using a template matching algorithm. We then computed a white point  
 158 based upon the mean colour of the pixels located within each of the four boxes and a black  
 159 point based upon the mean colour of the pixels in the black borders of these boxes. The image  
 160 is then white balanced via the following formula:

161  
 162  
 163 
$$I_{balanced} = \frac{(I - black\_point) * mean(white\_point)}{(white\_point - black\_point)}$$

164  
 165 This formula does require the assumption that the paper which the template has been printed  
 166 on is some value of grey, (i.e. the RGB values are all identical).  
 167

168

## 169 **2.4.2. Segmentation**

170 To identify and segment the haemorrhagic lesions in images, a deep learning method based  
171 on the widely-used U-Net architecture was applied [22]. We also included a few modifications  
172 based upon more recent findings. Namely, we replaced the deconvolution layers in the  
173 expanding path with bilinear upsampling followed by a 2x2 convolution and included batch  
174 normalisation layers [23,24]. The resulting architecture contains approximately 31 million  
175 trainable parameters.

176 Our dataset consisted of 29 training images taken via smartphone. Each image  
177 contains between 1 and 32 mice displaying varying levels of haemorrhagic damage for a total  
178 of 217 mice. To limit annotator bias, each image was annotated by two different annotators,  
179 resulting in two masks per image. For evaluating performance, we set aside 20% of the images  
180 at random as a validation test set. Thereafter, a 5-fold cross-validation was performed on the  
181 remaining 23 images, evaluating model performance on the validation test set for each fold.  
182 This was repeated 5 times to avoid test-set bias.

183 At the time of training, the images were split into samples of size 256 x 256 pixels and  
184 fed into the model in batches of 32 samples. Batches were created such that each sample  
185 had a 75% chance of having a masked section of haemorrhagic tissue according to at least  
186 one annotator. The masks used for training were sampled from the set of annotators at  
187 random. Data augmentations included flips, rotations, noise, blurring, sharpening, distortions,  
188 brightness, contrast, hue, and saturation adjustments. Augmentations were selected to  
189 simulate the possible variation in both the lighting environment as well as the smartphone  
190 camera's built-in post-processing implementations.

191 The models were trained using the Adam optimizer with a learning rate of 0.0001 for  
192 100 epochs. We used a loss function based upon a combination of the Mathews correlation  
193 coefficient (MCC) and cross-entropy [25]. We report the average F1 (Dice), MCC, and  
194 accuracy for each model as computed on the test set. F1/Dice is the harmonic mean of  
195 precision and recall and ranges between 0 and 1, where 1 is a perfect score. MCC ranges  
196 from -1 to 1, with 1 being a perfect score.

197

## 198 **2.4.3. Scaling**

199 It is essential for computing an accurate HaU that the scale of the images is determined. With  
200 the template, this can be done automatically by first detecting the black squares (via template  
201 matching) in the corners and then determining the number of white pixels inside the black  
202 square via thresholding. The inner white region is a 10 mm x 10 mm square, so the pixel  
203 resolution can be computed with the formula below.

204

$$205 \quad \text{Pixel\_resolution} = \frac{\sqrt{(\text{num\_white\_pixels})}}{10}$$

206

207 For improved accuracy, we then averaged the results across the four black squares.

208

209 For images without the template, the scale was determined manually by using FIJI's measure  
210 tool on a known distance in the image [26]. Once the image scale was determined, we resized  
211 all images to ensure a resolution of 5 pixels per mm, which also allows for rapid computation.

212

## 213 **2.4.4 Calculation of HaU and minimum haemorrhagic dose**



214 Haemorrhagic units were calculated as described in Jenkins *et al.* 2017 [21]. Briefly, the RGB  
215 values and area of a given lesion were extracted and colour/scale adjusted. Thereafter, the  
216 luminance (i.e., intensity) was calculated, combined with the area of the lesion, and expressed  
217 as HaUs. Thereafter, the minimum haemorrhagic dose (MHD) of *B. asper* venom was  
218 calculated. This calculation was carried out using linear regression on the means of the values  
219 from table 4. From the resulting function, we calculated the venom dose needed for a 50 HaU  
220 signal by replacing the Y with 50 and calculating X. The software used was GraphPad Prism  
221 version 9.2.0.

222

#### 223 **2.4.5 Implementation in GUI**

224 Using Streamlit (<https://github.com/streamlit/streamlit>) and localtunnel  
225 (<https://github.com/localtunnel/localtunnel>) with Google Colab, a simple web-based  
226 application to automatically analyse images was developed (  
227 <https://github.com/laprade117/ALOHA>). A web-based application seems to be the most  
228 efficient way to quickly analyse data while working in the lab. Users can take a photo with a  
229 smartphone and upload it to the web-based tool (accessible via a smartphone browser) for an  
230 immediate result (supplementary Figure 3).

231

232

### 233 **3. Results**

234 In this study, we primarily present the results for the six images that used the template to  
235 evaluate the performance of our fully automated method, ALOHA. We used, as a model, the  
236 haemorrhagic lesions induced by the venom of *B. asper* on mice.

237

#### 238 **3.1 White balancing**

239 To address the potential impact of lighting differences, the tool automatically performs white  
240 balancing. The white balancing works as expected and produces comparable results across  
241 images (Fig. 3).

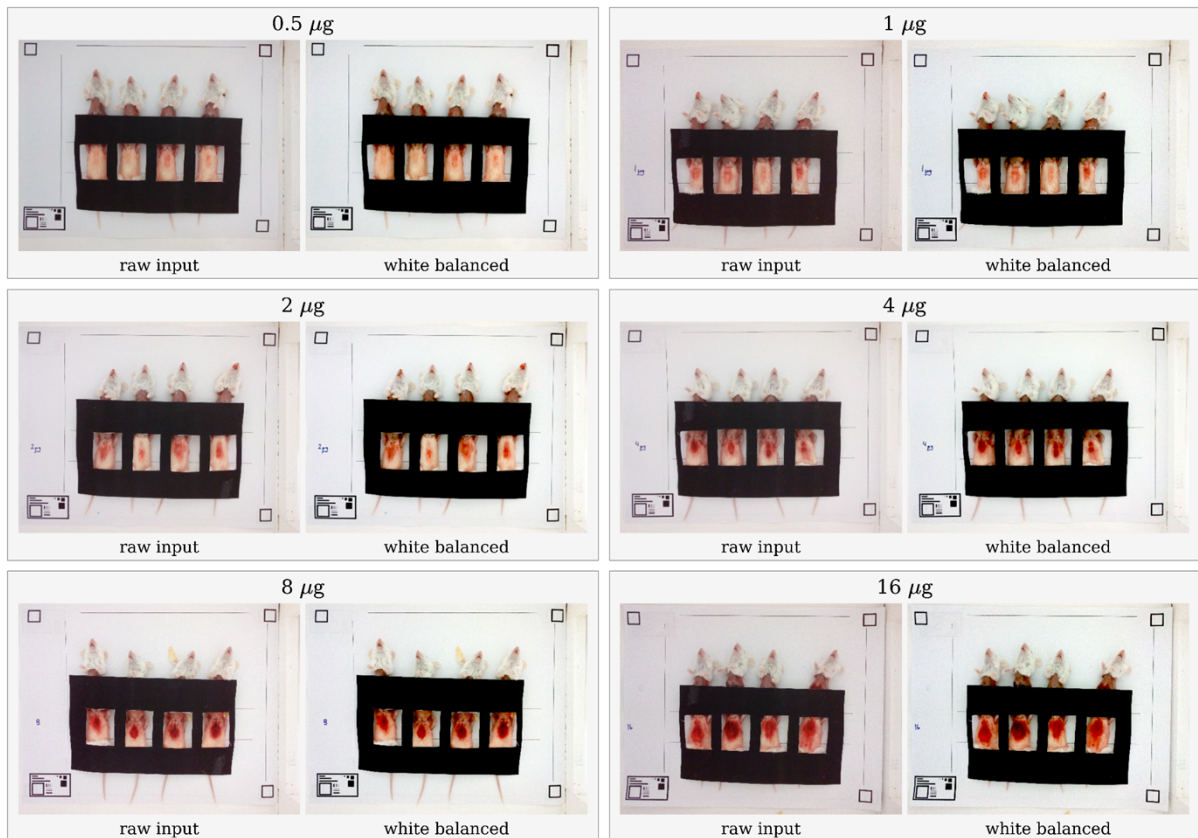

242  
243 **Figure 3. An overview of ALOHA's automatic white balancing output across the**  
244 **different test images.**  
245

### 246 **3.2 Scaling**

247 Using the scaling method outlined in 2.4.3, the tool automatically detects the image scales  
248 and reports them (Table 1).  
249

250 **Table 1.** Table outlining the input dimensions, detected scale, target scale, and output  
251 dimensions across six test images.  
252

|                                   | 1           | 2           | 3           | 4           | 5           | 6           |
|-----------------------------------|-------------|-------------|-------------|-------------|-------------|-------------|
| Input dimensions (pixel x pixel)  | 2448 x 3264 | 2448 x 3264 | 2448 x 3264 | 2448 x 3264 | 2448 x 3264 | 2448 x 3264 |
| Detected scale (pixels per mm)    | 11.4765     | 11.4863     | 11.4575     | 11.3564     | 11.4654     | 11.8486     |
| Target scale (pixels per mm)      | 5           | 5           | 5           | 5           | 5           | 5           |
| Output dimensions (pixel x pixel) | 1050 x 1400 | 1048 x 1398 | 1017 x 1356 | 1053 x 1405 | 1053 x 1404 | 1047 x 1396 |

### 253 254 **3.3 Segmentation**

255 To automatically identify lesion areas, the tool uses a machine learning guided segmentation  
256 approach. Overall, an average MCC score of 0.8612 and an average F1 (Dice) score of 0.9064  
257 was achieved, and we were able to predict 99.84% of the pixels correctly across 25 runs (Fig.  
258 4).



259

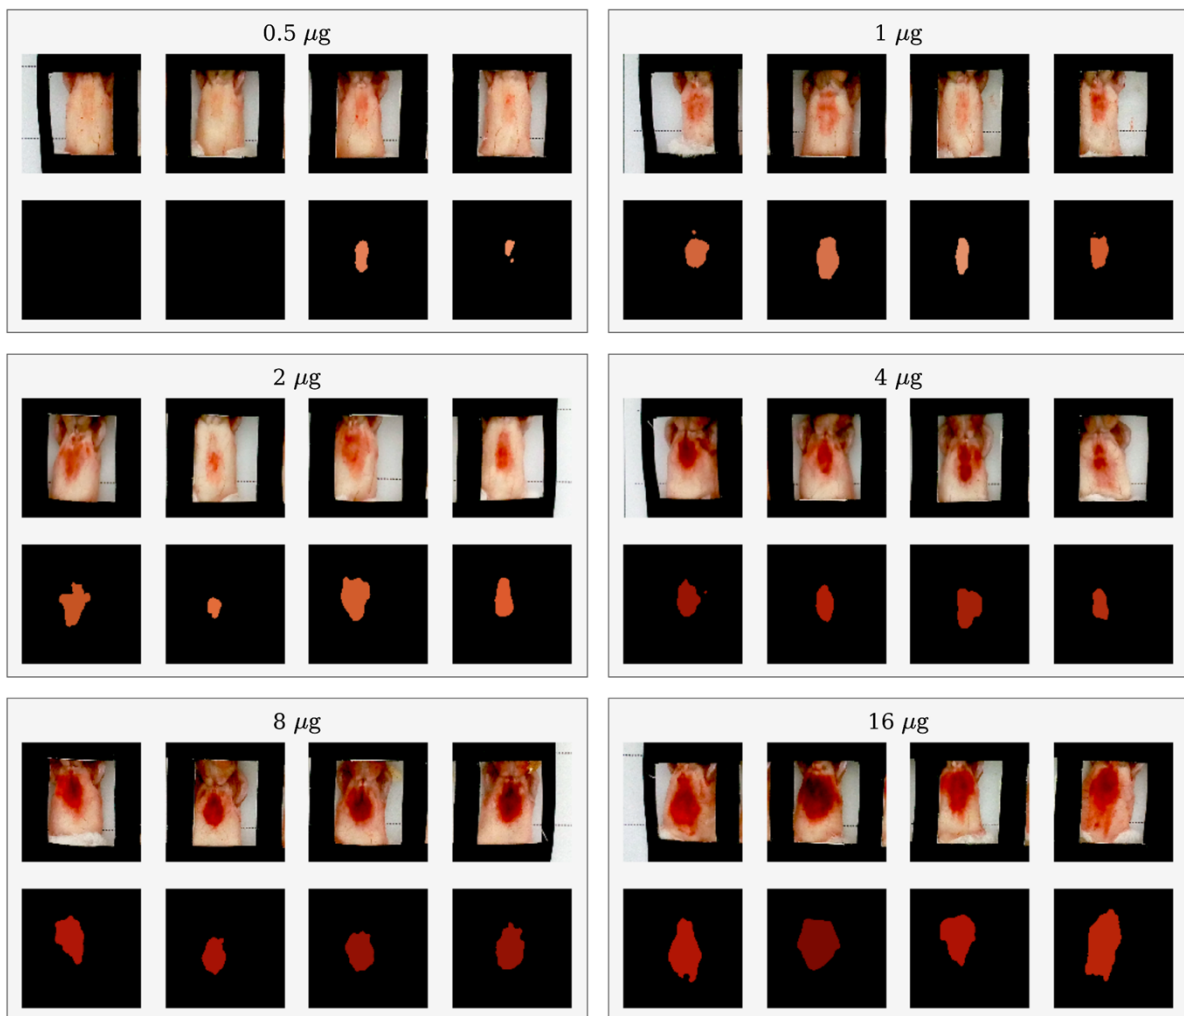

260

261

262

263

264

265

266

267

### 3.4 Haemorrhagic Units

268

269

270

271

272

273

To assess the severity of each lesion, the tool automatically computes the real-world area, luminance, and HaU for each mouse in all of the test images (Tables 2,3,4).

**Table 2. Individual and average (across one image) lesion sizes for all of the six test images.** The amount of *Bothrops asper* venom injected into the mice is indicated next to each batch of images.

| Venom ( $\mu\text{g}$ ) | Area ( $\text{mm}^2$ ) |         |         |         |         |           |
|-------------------------|------------------------|---------|---------|---------|---------|-----------|
|                         | Mouse 1                | Mouse 2 | Mouse 3 | Mouse 4 | Average | Std. Dev. |
| 0.5                     | 0.00                   | 0.00    | 63.08   | 23.16   | 21.56   | 25.77     |
| 1                       | 98.80                  | 132.68  | 68.80   | 86.84   | 96.78   | 23.32     |

|    |        |        |        |        |        |       |
|----|--------|--------|--------|--------|--------|-------|
| 2  | 138.88 | 39.36  | 169.40 | 101.32 | 112.24 | 48.50 |
| 4  | 111.84 | 90.80  | 139.04 | 72.60  | 103.57 | 24.74 |
| 8  | 174.92 | 115.96 | 156.48 | 179.28 | 156.66 | 25.01 |
| 16 | 248.32 | 286.84 | 221.00 | 320.32 | 269.12 | 37.69 |

274  
275  
276  
277

**Table 3.** Individual and average (across one image) lesion luminance for all of the test images. The amount of *Bothrops asper* venom injected into the mice is indicated next to each batch of images.

| Luminance (cd/m <sup>2</sup> ) |         |         |         |         |         |           |
|--------------------------------|---------|---------|---------|---------|---------|-----------|
| Venom (µg)                     | Mouse 1 | Mouse 2 | Mouse 3 | Mouse 4 | Average | Std. Dev. |
| 0.5                            | 0.00    | 0.00    | 0.32    | 0.39    | 0.18    | 0.18      |
| 1                              | 0.24    | 0.27    | 0.38    | 0.22    | 0.27    | 0.06      |
| 2                              | 0.19    | 0.27    | 0.21    | 0.23    | 0.23    | 0.03      |
| 4                              | 0.07    | 0.10    | 0.09    | 0.11    | 0.09    | 0.02      |
| 8                              | 0.10    | 0.09    | 0.07    | 0.07    | 0.08    | 0.01      |
| 16                             | 0.10    | 0.04    | 0.09    | 0.11    | 0.09    | 0.03      |

278  
279  
280  
281

**Table 4.** Individual and average (across one image) lesion haemorrhagic units for all of the test images. The amount of *Bothrops asper* venom injected into the mice is indicated next to each batch of images.

| Haemorrhagic units (HaU) |         |         |         |         |         |           |
|--------------------------|---------|---------|---------|---------|---------|-----------|
| Venom (µg)               | Mouse 1 | Mouse 2 | Mouse 3 | Mouse 4 | Average | Std. Dev. |
| 0.5                      | 0.00    | 0.00    | 19.56   | 5.93    | 6.37    | 7.99      |
| 1                        | 42.01   | 49.98   | 18.09   | 40.34   | 37.60   | 11.84     |
| 2                        | 74.79   | 14.43   | 79.00   | 44.38   | 53.15   | 26.04     |
| 4                        | 154.67  | 90.69   | 154.71  | 63.15   | 115.81  | 40.09     |
| 8                        | 180.76  | 134.09  | 239.51  | 266.37  | 205.18  | 51.41     |
| 16                       | 248.77  | 644.71  | 233.08  | 280.86  | 351.85  | 169.96    |

282  
283  
284  
285  
286  
287

### 3.4 Calculation of minimum hemorrhagic dose

Using linear regression (Figure X), we obtained the function  $Y = 21.83(\pm 1.18)X + 13.73(\pm 8.91)$ , from which we calculated the MHD on the proposed method from our earlier work (50 HaU) [21]. This resulted in a MHD of 1.66 (SD: -0.34, +0.30).

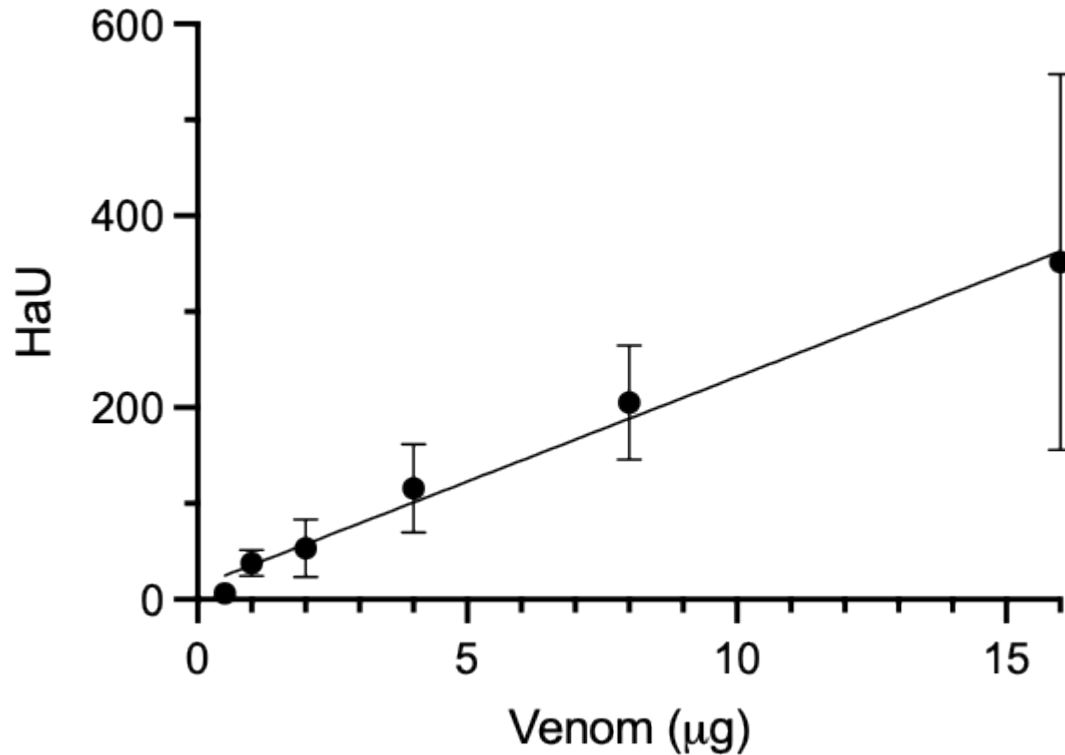

288

289 **Figure 5. Linear regression of the means calculated from table 4, with standard**  
290 **deviations shown as error bars.** The y-axis shows the HaUs and the x-axis shows the  
291 amount of venom used for the corresponding HaU level. Analysis was carried out using  
292 GraphPad Prism version 9.2.0.

293

### 294 **3.5 Tool GUI**

295 To ensure accessibility and easy implementation of ALOHA across research, production, and  
296 quality control laboratories, a graphical user interface was developed (  
297 <https://github.com/laprade117/ALOHA>). Our tool can be used to quickly upload an image and  
298 receive statistics on the lesion area, luminance, and HaU for each mouse in the image (Fig.  
299 5).

300

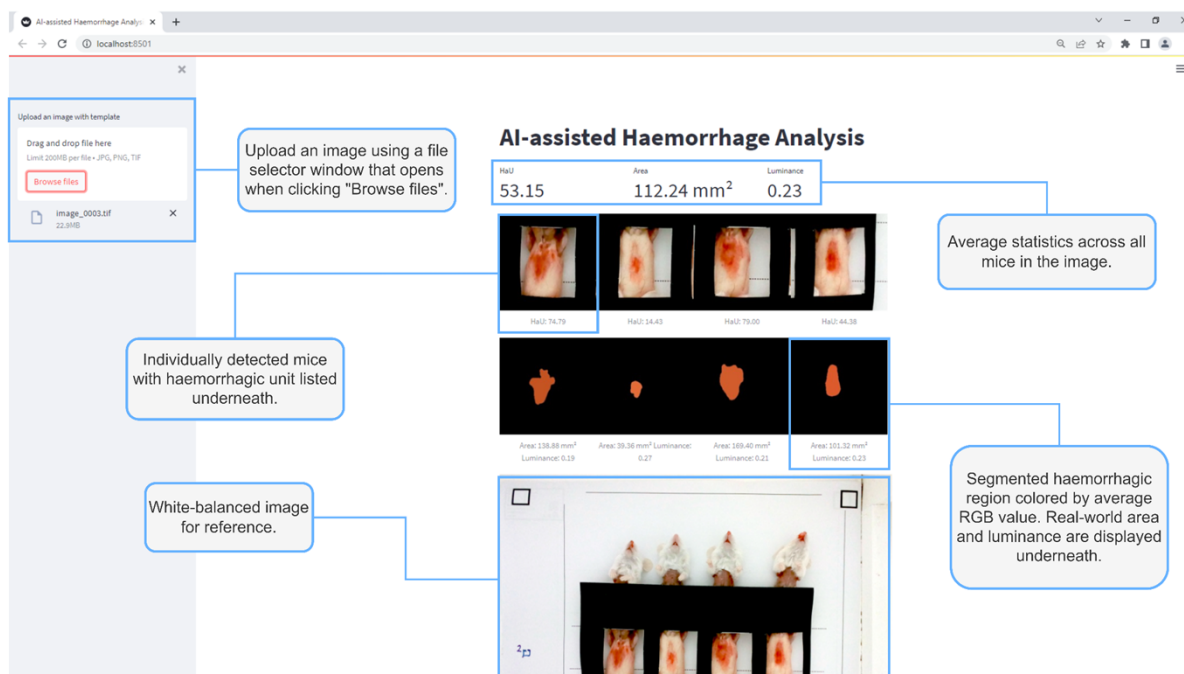

301  
302  
303  
304  
305  
306

**Figure 6. Image of ALOHA's web interface.** By uploading an image file of the experiment, the tool will, within seconds, provide the white balanced reference image, the individual lesions it detected, and how it decided to segment them, as well as all relevant data on lesion area, luminance, and HaUs.

#### 307 4. Discussion

308 Haemorrhage is one of the key pathophysiological manifestations of snakebite envenomings,  
309 particularly those inflicted by species of the family Viperidae [1,11]. Therefore, the preclinical  
310 assessment of antivenom efficacy includes the evaluation of the neutralisation of  
311 haemorrhagic activity [27]. This results in both a need for robust and reliable, but also rapid  
312 assay approaches, while limiting required resources, which would allow their implementation  
313 in diverse laboratory settings. In our earlier study, we were able to improve the classical rodent  
314 skin test by increasing the accuracy of haemorrhage characterisation and reducing the time  
315 required for analysis in comparison to the original approach, as well establish that HaUs  
316 accurately reflect haemoglobin content analysis<sup>18</sup>. Therefore, our previous tool has been used  
317 in a series of later publications [28–37]. Nevertheless, our prior approach still remained time  
318 consuming, and required familiarisation with a new software and access to a colour pantone.  
319 Furthermore, it was subject to human error as lesions were manually annotated, which  
320 required training and would still differ from one individual to another.

321  
322 In this study, we aimed to address these shortcomings by implementing a fully automated  
323 analysis pipeline, aided by vision AI, i.e. U-Net. We found that our tool, ALOHA, was able to  
324 rapidly and robustly assess the training images that covered a range of haemorrhagic lesion  
325 severities. We observed consistent white balancing, error-free scaling, and accurate  
326 segmentation. Notably, segmentation was conducted on a limited dataset to minimise animal  
327 usage prior to validation of this approach. Nevertheless, U-Net has demonstrated, across  
328 many studies [22,38–40], its robustness despite small training datasets, as was the case in  
329 our study; segmentation consistently aligned with our expert opinion, even when artificially  
330 manipulating the images to simulate a range of different laboratory/lighting conditions for a

331 harsher image testing environment. Additionally, the HaU values calculated across the test  
332 images fall within the same range as prior findings [21,28,32,37], allowing for easy comparison  
333 and the prior validated suggestion of 50 HaU as MHD [21].

334

335 To ensure optimal accessibility and ease of implementation into existing workflows, we  
336 developed a GUI-based web tool that allows users to conduct fast and accurate analyses of  
337 haemorrhagic lesions. Using a smartphone, it takes less than a minute to take a photo, upload  
338 the image, and receive accurate information on the severity of a venom-induced haemorrhagic  
339 lesion in mice. This substantially decreases the analysis time required, from hours, to just a  
340 few minutes. Furthermore, the ease-of-use significantly boosts the accessibility of our method  
341 and provides a standard tool to be used across labs that does not require training or prior  
342 knowledge on lesion assessment.

343

344 Despite the benefits ALOHA holds, some possible limitations may exist. In properly illuminated  
345 environments, the white balancing performs accurately. However, in shadowed, or strangely  
346 lit environments, the white balancing may not perform as well. To mitigate this, it is  
347 recommended to photograph in bright, uniformly lit environments. It is especially important to  
348 avoid casting shadows on or covering the black squares on the template paper for optimal  
349 results. Furthermore, due to the translucency of a single sheet of paper, it is best to avoid  
350 placing the template on a brightly colored table or desk when photographing. Scaling is  
351 computed via information obtained from the black squares at the corners of the template  
352 paper. This computation assumes that the black squares are perfect 10 mm x 10 mm squares.  
353 Thus, for the most accurate results, it is best to use flat unwrinkled paper and photograph  
354 directly from above, so that there is the least amount of distortion applied to the black squares.

355

## 356 **5. Conclusion**

357 With ALOHA, we introduce a new algorithm for the assessment of venom-induced skin  
358 haemorrhage in mice by relying on machine learning guided image analysis approaches. This  
359 algorithm eliminates the risk of human biases in assessing lesion areas and increases the  
360 speed of analysis substantially. Furthermore, its open access web-based graphical user  
361 interface makes it easy to use and implement in laboratories across the globe. This markedly  
362 decreases the resources required for a given analysis, such as analysis and training time, and  
363 ensures reproducibility of the results.

364



## 365 **Acknowledgments**

366 TP Jenkins is the grateful recipient of funding from the European Union's Horizon 2020  
367 research and innovation program under the Marie Skłodowska-Curie grant agreement no.  
368 713683 (COFUNDfellowsDTU). A.H.L. acknowledges funding support from the Villum  
369 Foundation (Grant No. 00025302) and the European Research Council (ERC) under the  
370 European Union's Horizon 2020 research and innovation programme (Grant agreement No.  
371 850974).

372

## 373 **Author Contributions**

374 All authors contributed to writing and editing the manuscript.

375

## 376 **Conflict of interest statement**

377 The authors declare no conflict of interest.

## 378 References

- 379 1. Gutiérrez JM, Calvete JJ, Habib AG, Harrison RA, Williams DJ, Warrell DA. Snakebite  
380 envenoming. *Nat Rev Dis Primer*. 2017;3: 17063. doi:10.1038/nrdp.2017.63
- 381 2. Chippaux JP. Estimate of the burden of snakebites in sub-Saharan Africa: a meta-  
382 analytic approach. *Toxicon*. 2011;57: 586–99. doi:10.1016/j.toxicon.2010.12.022
- 383 3. Harrison RA, Hargreaves A, Wagstaff SC, Faragher B, Lalloo DG. Snake Envenoming:  
384 A Disease of Poverty. *PLoS Negl Trop Dis*. 2009;3: e569.  
385 doi:10.1371/journal.pntd.0000569
- 386 4. Mohapatra B, Warrell DA, Suraweera W, Bhatia P, Dhingra N, Jotkar RM, et al.  
387 Snakebite mortality in India: a nationally representative mortality survey. *PLoS Negl*  
388 *Trop Dis*. 2011;5: e1018.
- 389 5. Chippaux JP. Snake-bites: appraisal of the global situation. *Bull World Health Organ*.  
390 1998;76: 515–24.
- 391 6. Kasturiratne A, Wickremasinghe AR, de Silva N, Gunawardena NK, Pathmeswaran A,  
392 Premaratna R, et al. The global burden of snakebite: a literature analysis and modelling  
393 based on regional estimates of envenoming and deaths. *PLoS Med*. 2008;5: e218.  
394 doi:10.1371/journal.pmed.0050218
- 395 7. Williams D, Gutiérrez JM, Harrison R, Warrell DA, White J, Winkel KD, et al. The Global  
396 Snake Bite Initiative: an antidote for snake bite. *The Lancet*. 2010;375: 89–91.  
397 doi:10.1016/S0140-6736(09)61159-4
- 398 8. Warrell DA. Snake bite. *Lancet*. 2010;375: 77–88. doi:10.1016/S0140-6736(09)61754-2
- 399 9. Kazandjian TD, Petras D, Robinson SD, van Thiel J, Greene HW, Arbuckle K, et al.  
400 Convergent evolution of pain-inducing defensive venom components in spitting cobras.  
401 *Science*. 2021;371: 386–390.
- 402 10. Calvete JJ. Proteomic tools against the neglected pathology of snake bite envenoming.  
403 *Expert Rev Proteomics*. 2011;8: 739–758.
- 404 11. Gutiérrez JM, Escalante T, Rucavado A, Herrera C. Hemorrhage Caused by Snake  
405 Venom Metalloproteinases: A Journey of Discovery and Understanding. *Toxins*.  
406 2016;8: 93–93. doi:10.3390/toxins8040093
- 407 12. Escalante T, Rucavado A, Fox JW, Gutiérrez JM. Key events in microvascular damage  
408 induced by snake venom hemorrhagic metalloproteinases. *J Proteomics*. 2011;74:  
409 1781–1794.
- 410 13. Cardoso JLC, França F de S, Wen FH, Malaque CMS, HADDAD Jr Vidala. Animais  
411 peçonhentos no Brasil: biologia, clínica e terapêutica dos acidentes. *Rev Inst Med Trop*  
412 *São Paulo*. 2003;45: 338–338.
- 413 14. White J. Snake Venoms and Coagulopathy. *Toxicon*. 2005;45: 951–967.
- 414 15. Organization WH. Rabies and envenomings: a neglected public health issue: report of  
415 a consultative meeting, World Health Organization, Geneva, 10 January 2007. World  
416 Health Organization; 2007.
- 417 16. World Health Organization. WHO guidelines for the production, control and regulation  
418 of snake antivenom immunoglobulins. WHO Tech Rep Ser Geneva Switz WHO. 2010;  
419 1–134.
- 420 17. Gutiérrez JM, Solano G, Pla D, Herrera M, Segura Á, Villalta M, et al. Assessing the  
421 preclinical efficacy of antivenoms: From the lethality neutralization assay to  
422 antivenomics. *Toxicon*. 2013;69: 168–179. doi:10.1016/j.toxicon.2012.11.016
- 423 18. Kondo H, KONDO S, IKEZAWA H, MURATA R, OHSAKA A. Studies on the  
424 quantitative method for determination of hemorrhagic activity of Habu snake venom.  
425 *Jpn J Med Sci Biol*. 1960;13: 43–51.
- 426 19. Theakston R, Reid H. Development of simple standard assay procedures for the  
427 characterization of snake venoms. *Bull World Health Organ*. 1983;61: 949.
- 428 20. Gutiérrez J, Gené J, Rojas G, Cerdas L. Neutralization of proteolytic and hemorrhagic  
429 activities of Costa Rican snake venoms by a polyvalent antivenom. *Toxicon*. 1985;23:  
430 887–893.

- 431 21. Jenkins TP, Sánchez A, Segura Á, Vargas M, Herrera M, Stewart TK, et al. An  
432 improved technique for the assessment of venom-induced haemorrhage in a murine  
433 model. *Toxicon*. 2017;139: 87–93. doi:10.1016/j.toxicon.2017.10.005
- 434 22. Ronneberger O, Fischer P, Brox T. U-net: Convolutional networks for biomedical image  
435 segmentation. *International Conference on Medical image computing and computer-*  
436 *assisted intervention*. Springer; 2015. pp. 234–241.
- 437 23. Sergey Ioffe, Christian Szegedy. Batch Normalization: Accelerating Deep Network  
438 Training by Reducing Internal Covariate Shift. In: Francis Bach, David Blei, editors.  
439 *Proceedings of the 32nd International Conference on Machine Learning*. PMLR; 2015.  
440 pp. 448–456. Available: <https://proceedings.mlr.press/v37/loff15.html>
- 441 24. Odena A, Dumoulin V, Olah C. Deconvolution and checkerboard artifacts. *Distill*.  
442 2016;1: e3.
- 443 25. Chicco D, Jurman G. The advantages of the Matthews correlation coefficient (MCC)  
444 over F1 score and accuracy in binary classification evaluation. *BMC Genomics*.  
445 2020;21: 6. doi:10.1186/s12864-019-6413-7
- 446 26. Schindelin J, Arganda-Carreras I, Frise E, Kaynig V, Longair M, Pietzsch T, et al. Fiji:  
447 an open-source platform for biological-image analysis. *Nat Methods*. 2012;9: 676–682.
- 448 27. Gutiérrez MJ, Solano G, Pla D, Herrera M, Segura Á, Vargas M, et al. Preclinical  
449 Evaluation of the Efficacy of Antivenoms for Snakebite Envenoming: State-of-the-Art  
450 and Challenges Ahead. *Toxins*. 2017;9. doi:10.3390/toxins9050163
- 451 28. Mora-Obando D, Pla D, Lomonte B, Guerrero-Vargas JA, Ayerbe S, Calvete JJ.  
452 Antivenomics and in vivo preclinical efficacy of six Latin American antivenoms towards  
453 south-western Colombian *Bothrops asper* lineage venoms. *PLoS Negl Trop Dis*.  
454 2021;15: e0009073.
- 455 29. Bailon Calderon H, Yaniro Coronel VO, Cáceres Rey OA, Colque Alave EG, Leiva  
456 Duran WJ, Padilla Rojas C, et al. Development of nanobodies against hemorrhagic and  
457 myotoxic components of *Bothrops atrox* snake venom. *Front Immunol*. 2020;11: 655.
- 458 30. Calderon H, Coronel V, Rey O, Alave E, Duran W, Rojas C, et al. Development of  
459 Nanobodies Against Hemorrhagic and Myotoxic Components of *Bothrops atrox* Snake  
460 Venom. *Front Immunol*. 2020;11: 655. doi:10.3389/fimmu.2020.00655
- 461 31. Chen Y-C, Wang T-Y, Huang Y-K, Chang K-C, Chen M-H, Liu C-C, et al. Effects of  
462 Sodium Silicate Complex against Hemorrhagic Activities Induced by *Protobothrops*  
463 *mucrosquamatus* Venom. *Toxins*. 2021;13: 59.
- 464 32. Sánchez Brenes A. Evaluación proteómica y toxicológica del veneno de *Hemachatus*  
465 *haemachatus* y su comparación con venenos de cobras del género *Naja* sp. en  
466 términos de inmunoreactividad y neutralización cruzada para la preparación de un  
467 antiveneno poliespecífico para África.
- 468 33. Alfaro-Chinchilla A, Segura Á, Gómez A, Díaz C, Corrales G, Chacón D, et al.  
469 Expanding the neutralization scope of the Central American antivenom (PoliVal-ICP) to  
470 include the venom of *Crotalus durissus pifanorum*. *J Proteomics*. 2021;246: 104315.
- 471 34. Yong MY, Tan KY, Tan CH. Potential para-specific and geographical utility of Thai  
472 Green Pit Viper (*Trimeresurus albolabris*) Monovalent Antivenom: Neutralization of  
473 procoagulant and hemorrhagic activities of diverse *Trimeresurus* pit viper venoms.  
474 *Toxicon*. 2021;203: 85–92.
- 475 35. Albuлесcu L-O, Hale MS, Ainsworth S, Alsolaiss J, Crittenden E, Calvete JJ, et al.  
476 Preclinical validation of a repurposed metal chelator as an early-intervention  
477 therapeutic for hemotoxic snakebite. *Sci Transl Med*. 2020;12.  
478 doi:10.1126/scitranslmed.aay8314
- 479 36. Sánchez A, Herrera M, Villalta M, Solano D, Segura Á, Lomonte B, et al. Proteomic and  
480 toxinological characterization of the venom of the South African Ringhals cobra  
481 *Hemachatus haemachatus*. *J Proteomics*. 2018;181: 104–117.
- 482 37. Sabetto ATA, Rosa JG, Santoro ML. Rutin (quercetin-3-rutinoside) modulates the  
483 hemostatic disturbances and redox imbalance induced by *Bothrops jararaca* snake  
484 venom in mice. *PLoS Negl Trop Dis*. 2018;12: e0006774.
- 485 38. Dong H, Yang G, Liu F, Mo Y, Guo Y. Automatic brain tumor detection and

- 486 segmentation using U-Net based fully convolutional networks. annual conference on  
487 medical image understanding and analysis. Springer; 2017. pp. 506–517.
- 488 39. Laprade WM, Perslev M, Sporning J. How few annotations are needed for segmentation  
489 using a multi-planar U-Net? Deep Generative Models, and Data Augmentation,  
490 Labelling, and Imperfections. Springer; 2021. pp. 209–216.
- 491 40. Siddique N, Paheding S, Elkin CP, Devabhaktuni V. U-net and its variants for medical  
492 image segmentation: A review of theory and applications. IEEE Access. 2021.

493 **Supplementary Figure S1:** A4 printout template to be used for haemorrhage assays.

494

495 **Supplementary Figure S2:** A4 printout cover sheet to be used for haemorrhage assays.

496

497 **Supplementary Figure S3:** Graphical illustration of how to use the ALOHA tool. First you

498 open the Google colab tool (1.), then follow the instructions and connect to the server (2.),

499 open the menu bar if not already visible, and select Runtime -> Restart and run all (4.). After

500 a brief wait you use the link provided at the bottom of the page and follow the instructions.
